# Supplementary material for: Randomised, placebo-controlled study to assess the safety and efficacy of Enterosgel® in the treatment of functional abdominal pain in children and young people (ENTOPIC): study protocol for a clinical trial
Source: Research Square preprint supplement (doi:10.21203/rs.3.rs-8076973/v1), 2025-11-11
Supplement: Supplementary file 1 [file 778ef8d12a6de9e13e14c17d.docx]

**Randomised, placebo-controlled study to assess the safety and efficacy of Enterosgel® in the treatment of functional abdominal pain in children and young people (ENTOPIC): study protocol for a clinical trial**

**Additional file 1. Functional Abdominal Pain Disorder syndromes and sub-types according to Rome IV criteria [1, 20]**

**H2a.** **Functional Dyspepsia**. Must include one or more of the following bothersome symptoms at least 4 times a month for at least 2 months prior to diagnosis:

1. Postprandial fullness
2. Early satiation
3. Epigastric pain or burning not associated with defecation
4. After appropriate evaluation, the symptoms cannot be fully explained by another medical condition

Functional dyspepsia subtypes:

- Postprandial distress syndrome (H2a1) includes bothersome postprandial fullness or early satiation which prevents finishing a regular meal. Supportive features include upper abdominal bloating, postprandial nausea, or excessive belching.
- Epigastric pain syndrome (H2a2) includes all of the following: bothersome (severe enough to interfere with normal activities) pain or burning localized to the epigastrium. The pain is not generalized or localized to other abdominal or chest regions and is not relieved by defecation or passage of flatus. Supportive criteria can include (a) burning quality of the pain but without a retrosternal component, (b) commonly induced or relieved by ingestion of a meal but may occur while fasting.

**H2b.** **Irritable Bowel Syndrome**. Must include all of the following with criteria fulfilled for at least 2 months prior to diagnosis:

1. Abdominal pain at least 4 days per month over at least 2 months associated with one or more of the following:
2. Related to defecation and/or a change in frequency of stool and/or a change in form (appearance) of stool
3. In children with abdominal pain and constipation, the pain does not resolve with resolution of the constipation (children in whom the pain resolves have functional constipation, not IBS)
4. After appropriate evaluation, the symptoms cannot be fully explained by another medical condition

Irritable Bowel Syndrome (IBS) subtypes:

• Abdominal pain associated with constipation (IBS-C)*

• Abdominal pain associated with diarrhoea (IBS-D)

• Abdominal pain associated with constipation and diarrhoea mixed (IBS-M)

• Abdominal pain not otherwise specified (IBS-U)

*This sub-type refers to children with constipation and abdominal pain related to defecation or a change in frequency/form of stools where the abdominal pain persists despite the child having been treated successfully for constipation.

**H2c.** **Abdominal Migraine.** Must include all of the following occurring for at least with criteria fulfilled for at least 6 months prior to diagnosis:

1. Paroxysmal episodes of intense, acute periumbilical, midline or diffuse abdominal pain lasting 1 hour or more (should be the most severe and distressing symptom)
2. Episodes are separated by weeks to months
3. The pain is incapacitating and interferes with normal activities
4. Stereotypical pattern and symptoms in the individual patient
5. The pain is associated with two or more of the following:
6. Anorexia
7. Nausea
8. Vomiting
9. Headache
10. Photophobia
11. Pallor
12. After appropriate evaluation, the symptoms cannot be fully explained by another medical condition

**H2d.** **Functional Abdominal Pain** – **Not Otherwise Specified** Must be fulfilled at least 4 times per month for at least 2 months and include all of the following:

1. Episodic or continuous abdominal pain that does not occur solely during physiologic events (e.g., eating, menses)
2. Insufficient criteria for IBS, functional dyspepsia, or abdominal migraine
3. After appropriate evaluation, the abdominal pain cannot be fully explained by another medical condition

**Additional file 2. Avoidance of pregnancy amongst study participants**

A pregnancy test will be performed at Baseline on all female patients of child-bearing potential. Females of childbearing potential (over the age of 11 years; not surgically sterile (hysterectomy or bilateral oophorectomy), 12 months postmenopausal or otherwise incapable of pregnancy) and heterosexually active must use contraception throughout the screening period and the 8 weeks when they may be receiving study treatment. Acceptable methods of contraception are methods that can achieve a failure rate of less than 1% per year when used consistently and correctly are considered as highly effective birth control methods. Such methods include*:

- combined (oestrogen and progestogen containing) hormonal contraception associated with inhibition of ovulation:
  - oral
  - intravaginal
  - transdermal
- progestogen-only hormonal contraception associated with inhibition of ovulation:
  - oral
  - injectable
  - implantable
- intrauterine device (IUD)
- intrauterine hormone-releasing system (IUS)
- bilateral tubal occlusion
- vasectomised partner (Vasectomised partner is a highly effective birth control method provided that partner is the sole sexual partner of the woman of childbearing potential trial participant and that the vasectomised partner has received medical assessment of the surgical success)
- sexual abstinence (In the context of this guidance sexual abstinence is considered a highly effective method only if defined as refraining from heterosexual intercourse during the entire period of risk associated with the study treatments. The reliability of sexual abstinence needs to be evaluated in relation to the duration of the clinical trial and the preferred and usual lifestyle of the subject.)

The method of contraception must be documented in the patient’s medical records.

*****Clinical Trial Facilitation Group. 2014. Recommendations related to contraception and pregnancy testing in clinical trials. Final version 2024. Available at: http://efaidnbmnnnibpcajpcglclefindmkaj/https://www.hma.eu/fileadmin/dateien/HMA_joint/00-_About_HMA/03-Working_Groups/CTCG/2024_HMA_CTCG_Contraception_guidance_Version_1.2__March_2024.pd. Accessed 21 Apr 2025.

**Additional file 3: Treatment instructions**

- 1. **Age 3-6 years; double-blind phase**

**4 WEEK DOUBLE-BLIND PHASE (WEEKS 3-6)**

**ENTOPIC Treatment instructions for children aged 3-6 years**

**IMPORTANT! PLEASE READ BEFORE STARTING THE TREATMENT**

Enterosgel® is a safe, drug-free treatment with 30 years of safe use without any reports of serious adverse events. There is no risk of overdose. You may contact your research nurse at any time to discuss any questions.

**HOW TO STORE THE TREATMENT?**

- Do not use if the tube is damaged
- Keep out of the reach of children
- Store at room temperature (between +4 to +30 °C) and **not** in the fridge

**HOW TO TAKE THE TREATMENT?**

- **Take the treatment 2 hours before or after taking oral medications and 1 hour before or after meals**

**Preparing a single dose**

- Shake the tube well before opening and open immediately before use
- Add ½ the tube contents into the measuring cup (**45ml** line)
- Add room temperature water to the cup and fill to the **75ml** line
- Mix the cup contents well and drink straight away
- Keep the remaining ½ of the tube contents for the evening dose

**HOW MANY TIMES A DAY TO TAKE THE TREATMENT?**

***Week 1 and 2***

Use the tubes in the box labelled “**WEEK 1-2: Age 3-6 years, Double blind phase study treatment**”

Take **One DOSE IN THE MORNING & One DOSE IN THE EVENING** for **2 weeks**

***Week 3 and 4***

Use the tubes in the box labelled “**WEEK 3-4: Age 3-6 years, Double blind phase study treatment**”

Take **One DOSE IN THE MORNING & One DOSE IN THE EVENING** for **2 weeks**

**PLEASE NOTE: *It is important to know that your child’s bowel might start changing its habits, including slowing down and not having any stool for 1-2 days. This is completely normal.***

***If at any time your child does not have a bowel movement (no stool at all) for 2 days, stop the treatment and increase your child’s intake of water. After the next bowel movement, continue with a single dose once a day for a few days then return to two doses per day.***

- 1. **Age 3-6 years; open-label phase**

**4 WEEK OPEN-LABEL PHASE (WEEKS 7-10)**

**ENTOPIC Treatment instructions for children aged 3-6 years**

**IMPORTANT! PLEASE READ BEFORE STARTING THE TREATMENT**

Enterosgel® is a safe, drug-free treatment with 30 years of safe use without any reports of serious adverse events. There is no risk of overdose.

**HOW TO STORE THE TREATMENT?**

- Do not use if the tube is damaged, once opened it can be used for 30 days
- Keep out of the reach of children
- Store at room temperature (between +4 to +30 °C) and **not** in the fridge

**HOW TO TAKE THE ENTEROSGEL TREATMENT?**

- **Take the treatment 2 hours before or after taking oral medications and 1 hour before or after meals**

**Week 1 & 2**

- Shake the Enterosgel tube well before each opening
- For **one dose**: Measure **4 ml** of the gel onto the 5ml measuring spoon provided (just under a level spoonful)
- Fill the measuring cup with **75 ml** of room temperature water
- Add the spoon contents to the measuring cup and mix well, drink straight away

**Week 3 & 4**

- Shake the Enterosgel tube well before each opening
- For **one dose**: Measure **6 ml** of the gel onto the 5ml measuring spoon provided (just over a level spoonful)
- Fill the measuring cup with **75 ml** of room temperature water
- Add the spoon contents to the measuring cup and mix well, drink straight away

**HOW MANY TIMES A DAY TO TAKE THE TREATMENT?**

***Weeks 1 - 2***

Take **One DOSE IN THE MORNING & One DOSE IN THE EVENING** (see week 1&2 above for the correct dose)

***Week 3 and 4***

Take **One DOSE IN THE MORNING & One DOSE IN THE EVENING** (see week 3&4 above for the correct dose)

**PLEASE NOTE: *It is important to know that your child’s bowel might start changing its habits, including slowing down and not having any stool for 1-2 days. This is completely normal.***

***If at any time your child does not have a bowel movement (no stool at all) for 2 days, stop the treatment and increase your child’s intake of water. After the next bowel movement, continue with a single dose once a day for a few days then return to two doses per day.***

**3.3 Age 7-14 years; double blind phase**

**4 WEEK DOUBLE-BLIND PHASE (WEEKS 3-6)**

**ENTOPIC Treatment instructions for children aged 7-14 years**

**IMPORTANT! PLEASE READ BEFORE STARTING THE TREATMENT**

Enterosgel® is a safe, drug-free treatment with 30 years of safe use without any reports of serious adverse events. There is no risk of overdose. You may contact your research nurse at any time to discuss any questions.

**HOW TO STORE THE TREATMENT?**

- Do not use if the outer tube is damaged
- Keep out of the reach of children
- Store at room temperature (between +4 to +30 °C) and **not** in the fridge

**HOW TO TAKE THE TREATMENT?**

- **Take the treatment 2 hours before or after taking oral medications and 1 hour before or after meals**

**Preparing a single dose**

- Add **20ml** room temperature water into the measuring cup
- Shake the tube well before opening and open immediately before use
- Add **all** the contents of the tube into a glass and add the **20ml** of room temperature water, mix well and drink straight away

**HOW MANY TIMES A DAY TO TAKE THE TREATMENT?**

***Week 1 and 2***

Use the tubes in the box labelled “**WEEK 1-2: Age 7-14 years, Double blind phase study treatment**”

Take **One DOSE IN THE MORNING & One DOSE IN THE EVENING** for **2 weeks**

***Week 3 and 4***

Use the tubes in the box labelled “**WEEK 3-4: Age 7-14 years, Double blind phase study treatment**”

Take **One DOSE IN THE MORNING & One DOSE IN THE EVENING** for **2 weeks**

**PLEASE NOTE: *It is important to know that your child’s bowel might start changing its habits, including slowing down and not having any stool for 1-2 days. This is completely normal.***

***If at any time your child does not have a bowel movement (no stool at all) for 2 days, stop the treatment and increase your child’s intake of water. After the next bowel movement, continue with a single dose once a day for a few days then return to two doses per day.***

**3.4 Age 7-14 years; open label phase**

**4 WEEK OPEN-LABEL PHASE (WEEKS 7-10)**

**ENTOPIC Treatment instructions for children aged 7-14 years**

**IMPORTANT! PLEASE READ BEFORE STARTING THE TREATMENT**

Enterosgel® is a safe, drug-free treatment with 30 years of safe use without any reports of serious adverse events. There is no risk of overdose.

**HOW TO STORE THE TREATMENT?**

- Do not use if the tube is damaged, once opened it can be used for 30 days
- Keep out of the reach of children
- Store at room temperature (between +4 to +30 °C) and **not** in the fridge

**HOW TO TAKE THE ENTEROSGEL TREATMENT?**

- **Take the treatment 2 hours before or after taking oral medications and 1 hour before or after meals**

**Week 1 & 2**

- Shake the Enterosgel tube well before each opening
- For **one dose**: Measure **8 ml** of the gel onto the 10ml measuring spoon provided (just under a level spoonful)
- Fill the measuring cup with **100 ml** of room temperature water
- Add the spoon contents to the measuring cup and mix well, drink straight away

**Week 3 & 4**

- Shake the Enterosgel tube well before each opening
- For **one dose**: Measure **12 ml** of the gel onto the 10ml measuring spoon provided (just over a level spoonful)
- Fill the measuring cup with **100 ml** of room temperature water
- Add the spoon contents to the measuring cup and mix well, drink straight away

**HOW MANY TIMES A DAY TO TAKE THE TREATMENT?**

***Weeks 1 - 2***

Take **One DOSE IN THE MORNING & One DOSE IN THE EVENING** (see week 1&2 above for the correct dose)

***Week 3 and 4***

Take **One DOSE IN THE MORNING & One DOSE IN THE EVENING** (see week 3&4 above for the correct dose)

**PLEASE NOTE: *It is important to know that your child’s bowel might start changing its habits, including slowing down and not having any stool for 1-2 days. This is completely normal.***

***If at any time your child does not have a bowel movement (no stool at all) for 2 days, stop the treatment and increase your child’s intake of water. After the next bowel movement, continue with a single dose once a day for a few days then return to two doses per day.***

**3.5 Age 15-18 years; double blind phase**

**4 WEEK DOUBLE-BLIND PHASE (WEEKS 3-6)**

**ENTOPIC Treatment instructions for young people aged 15-18 yrs**

**IMPORTANT! PLEASE READ BEFORE STARTING THE TREATMENT**

Enterosgel® is a safe, drug-free treatment with 30 years of safe use without any reports of serious adverse events. There is no risk of overdose. You may contact your research nurse at any time to discuss any questions.

**HOW TO STORE THE TREATMENT?**

- Do not use if the outer tube is damaged
- Keep out of the reach of children
- Store at room temperature (between +4 to +30 °C) and NOT in the fridge

**HOW TO TAKE THE TREATMENT?**

- **Take the treatment 2 hours before or after taking oral medications and 1 hour before or after meals**

**Preparing a single dose**

- Add **100ml** room temperature water into the measuring cup
- Shake the tube well before opening and open immediately before use
- Add **all** the contents of the tube into a glass and add the **100ml** of room temperature water, mix well and drink straight away

**HOW MANY TIMES A DAY TO TAKE THE TREATMENT?**

***Week 1 and 2***

Use the tubes in the box labelled “**WEEK 1-2: Age 15-18 years, Double blind phase study treatment**”

Take **One DOSE IN THE MORNING & One DOSE IN THE EVENING** for **2 weeks**

***Week 3 and 4***

Use the tubes in the box labelled “**WEEK 3-4: Age 15-18 years, Double blind phase study treatment**”

Take **One DOSE IN THE MORNING & One DOSE IN THE EVENING** for **2 weeks**

**PLEASE NOTE: *It is important to know that your bowel might start changing its habits, including slowing down and not having any stool for 1-2 days. This is completely normal.***

***If at any time you do not have a bowel movement (no stool at all) for 2 days, stop the treatment and increase your intake of water. After the next bowel movement, continue with a single dose once a day for a few days then return to two doses per day.***

**3.6 Age 15-18 years; open-label phase**

**4 WEEK OPEN-LABEL PHASE (WEEKS 7-10)**

**ENTOPIC Treatment instructions for young people aged 15-18 yrs**

**IMPORTANT! PLEASE READ BEFORE STARTING THE TREATMENT**

Enterosgel® is a safe, drug-free treatment with 30 years of safe use without any reports of serious adverse events. There is no risk of overdose.

**HOW TO STORE THE TREATMENT?**

- Do not use if the tube is damaged, once opened it can be used for 30 days
- Keep out of the reach of children
- Store at room temperature (between +4 to +30 °C) and **not** in the fridge

**HOW TO TAKE THE ENTEROSGEL TREATMENT?**

- **Take the treatment 2 hours before or after taking oral medications and 1 hour before or after meals**

**Week 1 & 2**

- Shake the Enterosgel tube well before each opening
- For **one dose**: Measure **12 ml** of the gel onto the 15ml measuring spoon provided (just under a level spoonful)
- Fill a glass with **200 ml** of room temperature water (use the 100ml measuring cup)
- Add the spoon contents to the glass and mix well, drink straight away

**Week 3 & 4**

- Shake the Enterosgel tube well before each opening
- For **one dose**: Measure **18 ml** of the gel onto the 15ml measuring spoon provided (just over a level spoonful)
- Fill a glass with **200 ml** of room temperature water (use the 100ml measuring cup)
- Add the spoon contents to the glass and mix well, drink straight away

**HOW MANY TIMES A DAY TO TAKE THE TREATMENT?**

***Weeks 1 - 2***

Take **One DOSE IN THE MORNING & One DOSE IN THE EVENING** (see week 1&2 above for the correct dose)

***Week 3 and 4***

Take **One DOSE IN THE MORNING & One DOSE IN THE EVENING** (see week 3&4 above for the correct dose)

**PLEASE NOTE: *It is important to know that your child’s bowel might start changing its habits, including slowing down and not having any stool for 1-2 days. This is completely normal.***

***If at any time your child does not have a bowel movement (no stool at all) for 2 days, stop the treatment and increase your child’s intake of water. After the next bowel movement, continue with a single dose once a day for a few days then return to two doses per day.***

**Additional file 4: Daily diary**

4.1 Observational phase: To be completed daily during weeks 1-2

| 1. Choose the face that best describes the tummy pain you felt today. | 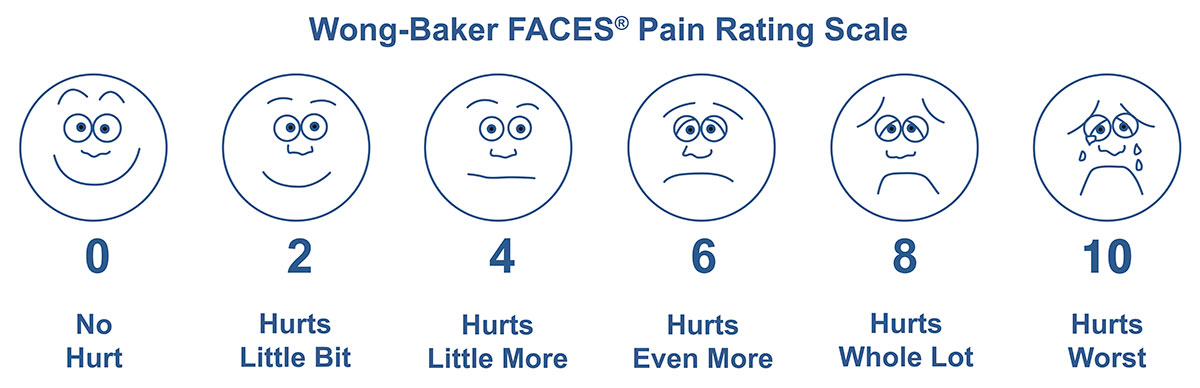 |
| --- | --- |

| 1. Did you miss nursery or school today because of your tummy pain? | **YES NO** |
| --- | --- |

4.2 Double-blind phase: To be completed daily during weeks 2-6

Please answer all three questions.

| 1. Choose the face that best describes the tummy pain you felt today. | 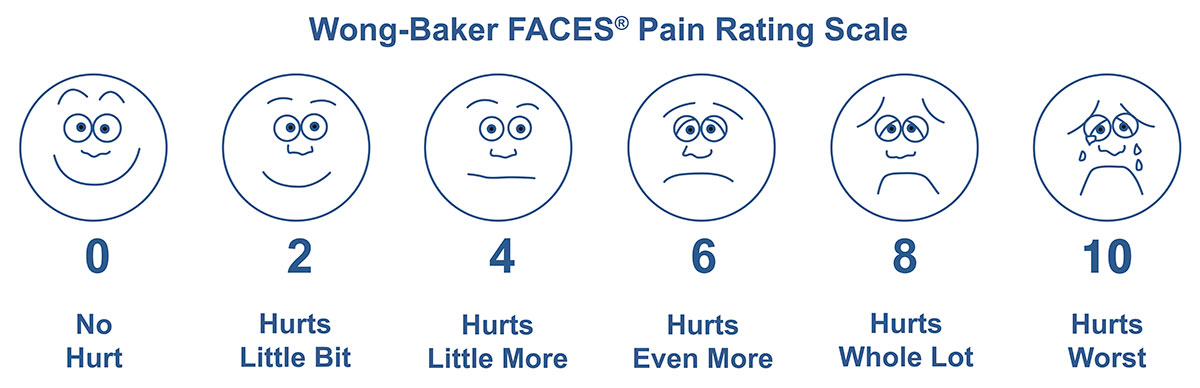 |
| --- | --- |

| 1. How many of the study gel drinks did you have today? | **(dropdown menu)**   - **2 study drinks** - **1 study drink** - **None - I forgot** - **None - I didn't feel well** - **None - I was constipated** - **None - study drinks not arrived** |
| --- | --- |
| 1. Did you miss nursery or school today because of your tummy pain? | **YES NO** |

4.3 Open-label phase: To be completed daily during weeks 7-10

| 1. Choose the face that best describes the tummy pain you felt today. | 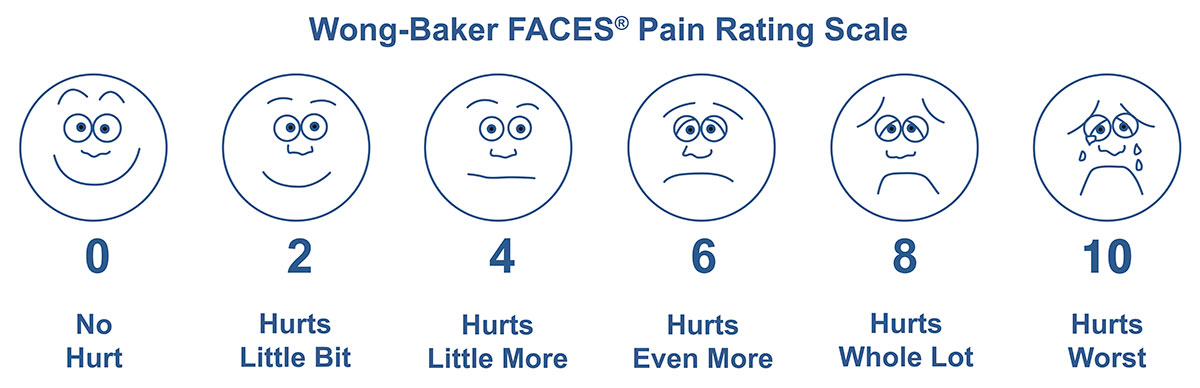 |
| --- | --- |

| 1. How many Enterosgel® gel drinks did you drink today? | **(dropdown menu)**   - **2 study drinks** - **1 study drink** - **None - I forgot** - **None - I didn't feel well** - **None - I was constipated** - **None - study drinks not arrived** |
| --- | --- |
| 1. Did you miss nursery or school today because of your tummy pain? | **YES NO** |

**Additional file 5: Adverse events (AEs)**

## 5.1 Definitions

AE: Any untoward medical occurrence, unintended disease or injury or any untoward clinical signs (including an abnormal laboratory finding) in subjects, users or other persons whether or not related to the investigational medical device. This includes AEs related to the investigational device, the comparator and any procedure in the clinical investigation plan. For users or other persons this is restricted to events related to the investigational medical device.

### 5.2 Adverse Device Effect (ADE): AE related to the use of an investigational medical device including any AE resulting from insufficiencies or inadequacies in the instructions for use, the deployment, the implantation, the installation, the operation, or any malfunction of the investigational medical device. This includes any event that is a result of a use error or intentional misuse.

### 5.3 Serious Adverse Device Effect (SADE): Adverse device effect that has resulted in any of the consequences characteristic of a serious AE.

### 5.4 Serious Adverse Event (SAE): AE that:

a) led to a death

b) led to a serious deterioration in health that either:

1. resulted in a life-threatening illness or injury, or
2. resulted in a permanent impairment of a body structure or a body function, or
3. required in-patient hospitalisation or prolongation of existing hospitalisation, or
4. resulted in medical or surgical intervention to prevent life threatening illness or injury or permanent impairment to a body structure or a body function.

c) led to foetal distress, foetal death or a congenital abnormality or birth defect.

This includes device deficiencies that might have led to a SAE if a) suitable action had not been taken or b) intervention had not been made or c) if circumstances had been less fortunate. These are handled under the SAE reporting system. A planned hospitalisation for pre-existing condition, or a procedure required by the Clinical Investigation Plan, without a serious deterioration in health, is not considered to be a SAE.

### 5.5 Unanticipated Serious Adverse Device Effect (USADE): SADE which by its nature, incidence, severity or outcome has not been identified in the current version of the risk analysis report or product safety information. An anticipated SADE is an effect which by its nature, incidence, severity or outcome has been previously identified in the risk analysis report

### 5.6 Expected AEs and AEs of Special Interest: According to the standard Package Information Leaflet, Enterosgel® can cause constipation and nausea. Constipation should only be considered an AE in this study if all of the following are met:

1. patient complains about it to the site research team
2. patient had at least 3 consecutive days without bowel movements
3. clinical intervention is required (i.e. laxative or other treatment)
